# Supplementary material for: Type 2 Nep1-Like Proteins from the Biocontrol Oomycete Pythium oligandrum Suppress Phytophthora capsici Infection in Solanaceous Plants
Source: MDPI journal article supplement (doi:10.3390/jof7070496), 2021-06-22
Supplement: s1 [file s1]

## Supplementary Information

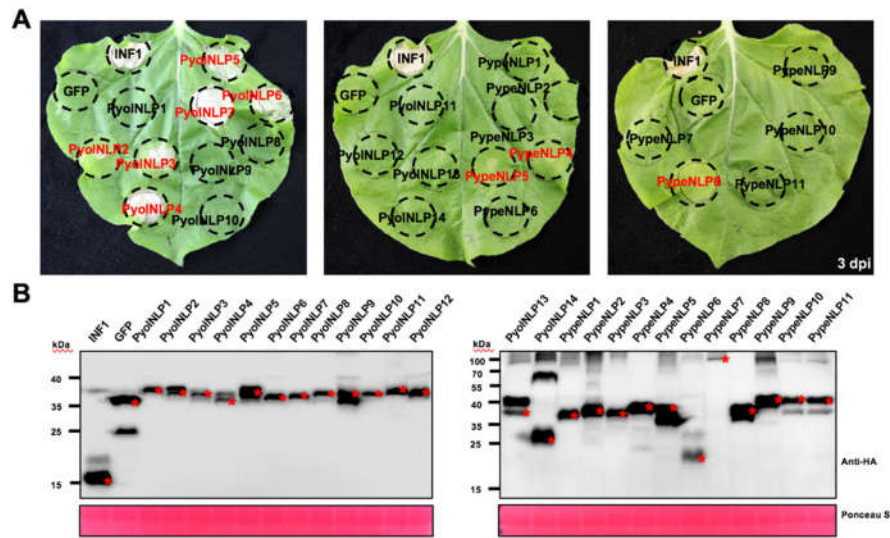

**Supplementary Figure S1.** Screening of the necrotic *PyoINLPs*/*PypeNLPs*. **(A)** *Agrobacterium tumefaciens* infiltration assay for screening *PyoINLPs*/*PypeNLPs* inducing necrosis. *PyoINLPs*/*PypeNLPs*, the cell death-inducing gene *INF1*, and the empty control (GFP) were expressed in *N. benthamiana* leaves via agroinfiltration. **(B)** The expression of all *PyoINLPs*/*PypeNLPs* in *N. benthamiana* leaves were confirmed by Western blotting using anti-HA antibody. \* indicates objective bands.

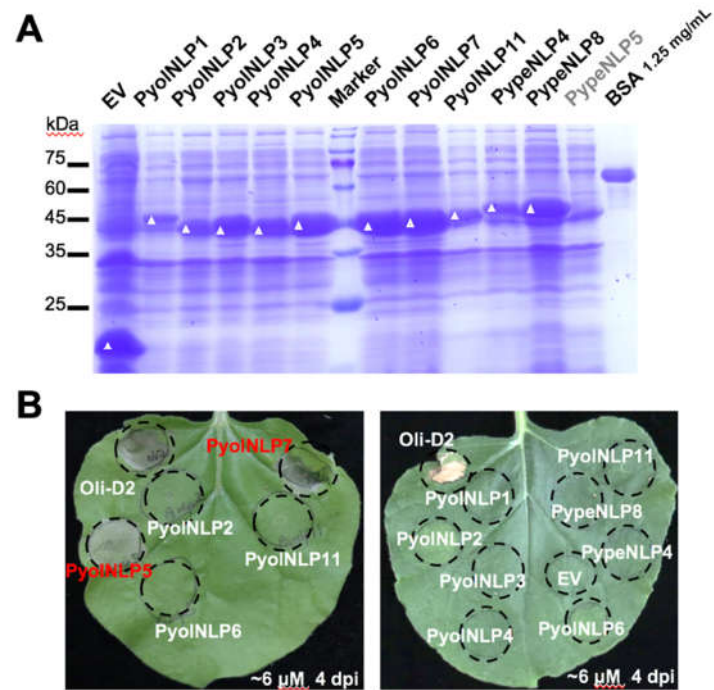

**Supplementary Figure S2.** Recombinant PyoINLP5 and PyoINLP7 induce necrosis in *N. benthamiana*. **(A)** SDS-PAGE analysis of NLP proteins stained with Coomassie blue. Recombinant proteins were produced in the *Escherichia coli* using the pET32a vector. Asterisks indicate the objective bands. **(B)** Representative *N. benthamiana* leaves infiltrated with about 6  $\mu$ M purified proteins. Photographs were taken at 4 dpi.

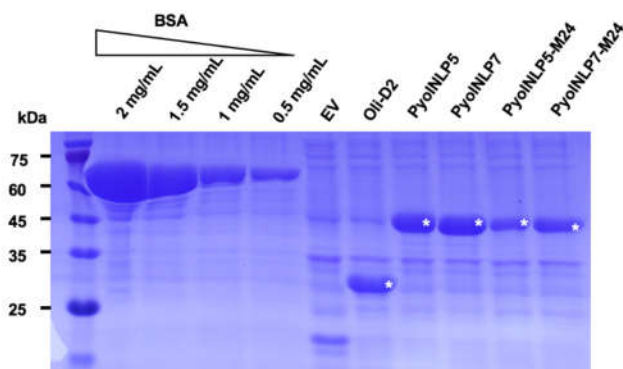

**Supplementary Figure S3.** SDS-PAGE analysis of PyoINLP5-24 and PyoINLP7-M24 proteins stained with Coomassie blue. Recombinant proteins were expressed in the *Escherichia coli* using the pET32a vector and purified using Ni-NTA resin.

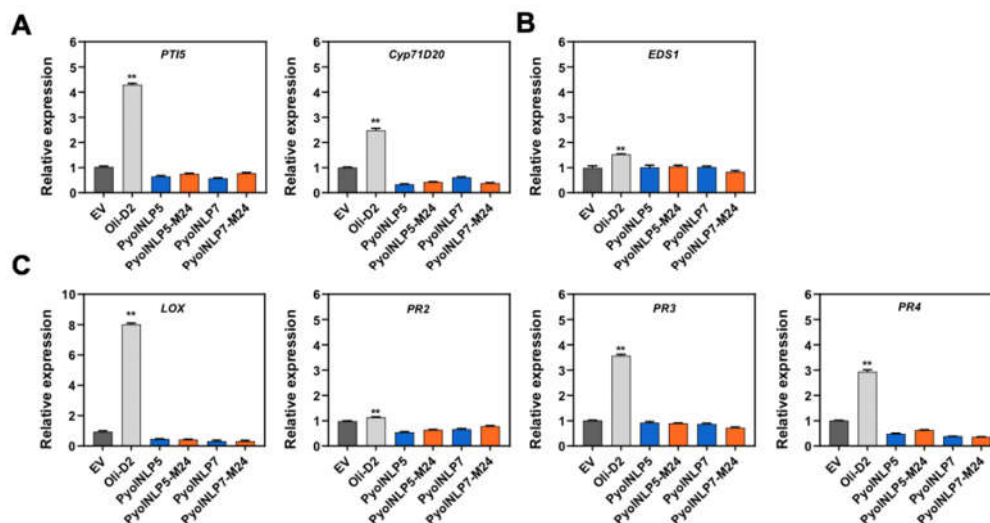

**Supplementary Figure S4.** Relative expression levels of key genes related to plant defense in *N. benthamiana* leaves infiltrated with partially purified PyoNLP5, PyoNLP7 or their mutant proteins. **(A)** Relative expression levels of PTI-involved *Cyp71D20* and *PTI5*. **(B)** Relative expression level of *EDS1*, which is involved in salicylic acid pathway. **(C)** Relative expression levels of *LOX*, *PR2*, *PR3*, *PR4*, which are involved in jasmonic acid and ethylene pathways. Purified His tag protein acts as a negative control. Purified Oli-D2 acts as a positive control. Leave samples were collected at 12 hpi. Transcription levels were determined by RT-qPCR using *EF1α* as the reference. Error bars represent the mean  $\pm$  s.d. ( $n = 3$ ). The results were analyzed by Median-edition Levene's test to determine the homogeneity of variances across groups, and then analyzed by one-way ANOVA with post-hoc Tukey's range test for groups with equal variances; \*\*,  $P < 0.01$ . Experiments were repeated three times with similar results.

**Supplementary Table S1.** Summary of 14 and 11 necrosis- and ethylene-inducing-like protein (NLP) genes in the genomes of *Pythium oligandrum* and *Pythium periplocum*, respectively.

**Supplementary Table S2.** Collinearity analysis of the left and right arms of NLP clustered region (Related to Figure 3B).

**Supplementary Table S3.** Primers used in this study.
