# Supplementary material for: Type 2 Nep1-Like Proteins from the Biocontrol Oomycete Pythium oligandrum Suppress Phytophthora capsici Infection in Solanaceous Plants
Source: J Fungi (Basel). 2021 Jun 22;7(7):496. doi: 10.3390/jof7070496 (PMC8303654; doi:10.3390/jof7070496)
Supplement: Supplementary file 1 [file jof-07-00496-s001.zip]

Archive with 4 entries (4 files):
- Supplementary figures.pdf
- Supplementary Table 1.xlsx
- Supplementary Table 2.xlsx
- Supplementary Table 3.xlsx
