# Supplementary material for: Type 2 Nep1-Like Proteins from the Biocontrol Oomycete Pythium oligandrum Suppress Phytophthora capsici Infection in Solanaceous Plants
Source: J Fungi (Basel). 2021 Jun 22;7(7):496. doi: 10.3390/jof7070496 (PMC8303654; doi:10.3390/jof7070496)
Supplement: Supplementary file 1 [file jof-07-00496-s001.zip › Supplementary Table 1.xlsx]

## Sheet: Sheet1
Supplementary Table 1 Summary of 14 and 11 necrosis- and ethylene-inducing-like protein (NLP) genes in the genomes of Pythium oligandrum and Pythium periplocum, respectively.
	Effector names	ID	Gene locus	DNA sequence	DNA length	Protein sequence	Protein length	Length of signal peptide	NPP domain	Necrosis/chlorotic-inducing activity
1	PyolNLP1	PYOLI_00013104-RA	NAJK01000055.1	ATGGCAGTCCGTTGCTTGGTCTCTACGATCGTGCTTGCTATTGTGCCACTCGCCAGTGGGATTGGTTTCGAGGTAATCACAGGTGACGTCTTCCCGAGTCTCTCGCGCTCATGGCCCAAGCACGTGGACATCTCGTCGATTACGCCACTCTTTGACATGGATGACAATGGCTGCTACCCAGCGGCCGTCATTAGTCGCTCTGGTGAGCCGAACCGAGGCCTGGAGACCGACGGCGGCAACTATGATGTCTGTAAACGCGACGATTTCCTCGAGTACTCGAATACGTATCACCGCTACGCGTGTCGTGTCGCCGATAACATCAAGTACTGCAGTCATTTCTTCACGCTCTACTTCCAAAAAGACGAAGCAACTCTCATCGGTGGCCATCGTCACGACCTC…	813	MAVRCLVSTIVLAIVPLASGIGFEVITGDVFPSLSRSWPKHVDISSITPLFDMDDNGCYPAAVISRSGEPNRGLETDGGNYDVCKRDDFLEYSNTYHRYACRVADNIKYCSHFFTLYFQKDEATLIGGHRHDLEQVVIWTMDGNVTHGSFSAHGGMTTWSASSIPHEGSHLKFVYHKDNIMTHAMRFARTKDALDPENPYKKFVLPPVVSWYTMKGDGDLTNSALRQLLNTLPYGKATMPIKDSVFLRNLNMRRPQGYPEFDDEDIKSSQ*	271	20	43-252	No
2	PyolNLP2	PYOLI_00013108-RA	NAJK01000055.1	ATGAAGCTTTTGACGATCCTCTCCGTCGTATGCGCTGCTGTCGCTGGCTCTGTGCGCGCTGATGACTTCCCAAAGCTCGATGAAGCCTGGCCCAAGAACGTGGACATCCGCTCGATCACGCCGGTGCTCGACACGGACACGGATTCGTGTTTGCCAAGCGCCATGGTGAGTCGCACTGCTCAGCAGAACGGAGGTCTCAAGCCAAGCGGTCAGATCGTCGGCAAGTGCTACAACCACGACTTTATGAATCTCTCCAACTCGTACCACCGCTACGCGTGCCAGAACAGTAATGGAAGCCAGTACTGCGCGCATTTGTTCGCGTACTACTTCCTCAAGGACCAGAAGATCAACTTCATCGAGAGTGGACATCGTCACGACTTGGAGCAGGTCGCAGTCTGG…	786	MKLLTILSVVCAAVAGSVRADDFPKLDEAWPKNVDIRSITPVLDTDTDSCLPSAMVSRTAQQNGGLKPSGQIVGKCYNHDFMNLSNSYHRYACQNSNGSQYCAHLFAYYFLKDQKINFIESGHRHDLEQVAVWTINGRVSHGSYSAHGKMYAKAASDIPNQDGHLKFVYHKDGTGTHAFRFAKNNEDAENPLRTFVFPTVVSWYTMKGDGIDNAGLRDKMNSHNYGSATMPIKDSTFLNNINNFRPSGFPVFTQDSVNNSQ*	262	20	35-244	Chlorotic
3	PyolNLP3	PYOLI_00013109-RA	NAJK01000055.1	ATGAACTGGTCCGCCATGCTCTCGCTCTGCGTCGCCACCGCCCTCAGTTCCGTCCACGCCGATGACTTCCCCAAGCTCGACGAGGCCATGCCTCGTAACATCGACATCCGTAGCATCACGCCCATGATCGACACGGACACAGACTCGTGTTTGCCGAGCGCTATGGTCAGCCGCACGGGTGCGCAGAACGCCGGATTGGACCCTGAGTGGGCCAGTTTGGTCAAGGGCTGTCGCAACAACGACTTCATGAACCTCTCCAACACGTACCATCGCTACGTGTGCCAGAACAACAACGGCAACCAGTACTGCGCACACTTGTTCGCGTACTACTTCCTCAAGGACCAGTCAGTGAATCTCATTCCAAGTGGTCACAAGAACGACTTGGAGCAGGTTGCGGTG…	789	MNWSAMLSLCVATALSSVHADDFPKLDEAMPRNIDIRSITPMIDTDTDSCLPSAMVSRTGAQNAGLDPEWASLVKGCRNNDFMNLSNTYHRYVCQNNNGNQYCAHLFAYYFLKDQSVNLIPSGHKNDLEQVAVWTINGRVSHGSYSAHGKMYNKAASEIPTQDGHLKFVYHKDGGSTHCFRFAGNNEFAENPAGTFVTPTVVSWYTMKGDGIDNGGLRDRMNNYNYGSATMPIKDSTFLNNVNTYKPGEFPVFTQDSVNNSQ*	263	20	35-245	Necrosis
4	PyolNLP4	PYOLI_00013110-RA	NAJK01000055.1	ATGAAGTGGATTGCCTTGCTCGCTTCTATCGCCTTGCTCGGCCGTGTTCGTGGTGATGATTTCCCCAAGCTCGATGCCGCGCCACCCAAGAACATCGATATCTTCTCCATCACGCCAGTTCTCGACATGGACACGGACTCGTGTCTTCCAAGTGCCGCCATCAGTCGTACTGGGGCCCAGAACGGAGGTCTCAACCCAAGCGGAAGTATCACTGGCGGCTGCCGACGCTCGGATTTCATGAACTATTCCAACACGTACCACCGTTACGCGTGTATCAGCAGCAACGGTAACCAGTACTGCGGGCACTTCTTCGCCTACTACTTCCTCAAGGACCAGGTATTGAGCACGGTTGGTGGTGGCCACCGTCACGATATTGAGCAGGTTGGTATCTGGACAACC…	780	MKWIALLASIALLGRVRGDDFPKLDAAPPKNIDIFSITPVLDMDTDSCLPSAAISRTGAQNGGLNPSGSITGGCRRSDFMNYSNTYHRYACISSNGNQYCGHFFAYYFLKDQVLSTVGGGHRHDIEQVGIWTTNGRVTHGGFSAHGAMTNLPANQIPQEGGRLKFVYHKDGVATHAIRFAKTNEAVENPTGAFVVPTLVSWFTMKADSINNAGLRNNLNSFDYGNANMPIKDSNFLNSLNKFRPAEYPAFTQASVDNSQ*	260	18	33-242	Necrosis
5	PyolNLP5	PYOLI_00013111-RA	NAJK01000055.1	ATGAACTGGTCCGCCATCCTCTCGCTCTGTGTCGCCGCCGCCCTCGGTTCCGTCCACGCCGATGACTTCCCCAAGCTCGACGAGGCCATGCCTCGTAACATCGACATTCGTGCCATCACGCCCGTGGTTGACACGGATACCGATGGCTGTCTCCCAAGCGCCATGGTGAGCCGCACCGGTCAGCAGAACGGTGGTTTGGCTCCTGGTTGGAGCAACCTCACCAAGGGCTGTCGCAACAACGACTTCATGAACCTCTCCAACACGTACCATCGTTACGTGTGCCAGAACAACAACGGCAACCAGTACTGCGCGCACTTGTTCGCGTACTACTTCCTCAAGGATCAGTCGGTCAACCTCATTCCAAGTGGTCACAAGCACGACTTGGAGCAGGTTGCTGTT…	789	MNWSAILSLCVAAALGSVHADDFPKLDEAMPRNIDIRAITPVVDTDTDGCLPSAMVSRTGQQNGGLAPGWSNLTKGCRNNDFMNLSNTYHRYVCQNNNGNQYCAHLFAYYFLKDQSVNLIPSGHKHDLEQVAVWTINGRVSHGSYSAHGKMYSKPASEIPTQDGHLKFVYHKDGGSTHCFRFAGNNEFAENPAGTFVTPTLVSWYTMKGDGIDNGGLRDKMNNYNYGSASMPIKDGSFLNNVNTYKPGEFPTFTQDSVNNSQ*	263	20	35-245	Necrosis
6	PyolNLP6	PYOLI_00013112-RA	NAJK01000055.1	ATGAAGTGGTCCGCCATCCTCTCGCTCTGTGTCGCCGCCGTCCTAGGTTCGGCCCACGCCGATGACTTCCCCAAGCTCGACGAGGCCATGCCCAAGAACGTCGACATCCGCGGTATTACGCCCGTGATCGACACGGATATGGATTCGTGTCTTCCTAGTGCCATGGTCAGTCGTACTGGTCAGCAGAACGGCGGGTTGGAACCAGCGTGGGCCAGTTTGGTCAAGGGATGTCGCAACAACGACTTCATGAAGCTCTCCAACACGTACCATCGTTACGTATGCCAGACGAGTAACAACAACCAGTACTGTGCGCACTTGTTTGCGTACTACTTCCTCAAGGATCAGTCGGTCAACCTGATTCCAAGCGGTCATAAGCATGACCTGGAATATGTCGCAGTG…	789	MKWSAILSLCVAAVLGSAHADDFPKLDEAMPKNVDIRGITPVIDTDMDSCLPSAMVSRTGQQNGGLEPAWASLVKGCRNNDFMKLSNTYHRYVCQTSNNNQYCAHLFAYYFLKDQSVNLIPSGHKHDLEYVAVWTINGRMTHGSYSAHGKTYNKPATEIPTQDGHLKFVYHKDGGLTHCFRFAQKNENAENPAGTFVLPTLASWYTMKGDGIDNAGLRNKLNSYSYGNANMPLKDGKFLDKVNSFKPSEFPSFTEDHAKNSQ*	263	20	36-245	Necrosis
7	PyolNLP7	PYOLI_00013113-RA	NAJK01000055.1	ATGAAGTGGGCCGCGCTCCTTGTCTTCTCCGCCGCCTTGCTCTCCACTGTCCGCGGCGACGACTTCCCCAAGCTCGATGCTGCACCACCAAAGAACATTGACATCTCGTCCATTACGCCAGTTCTTGACATGGACACGGACTCGTGTCTTCCAAGTGCGGCAATCAGTCGGAGTGGACAGCAGAATGGCGGCCTCAAGCCAACTGGAAAGATTACTGGTGGTTGTCGTCGCGGGGACTTCATGGACTTCTCAAACACGTACCATCGCTACGCGTGTGTGAACGGCAACGGCAACCAGTACTGTGGCCACTTCTTCGCTTACTACTTCCTCAAGGATCAAGCCGTCCCCACGTTTGGCGGTGGCCATCGCCACGACCTCGAGCAGATCGGTATCTGGACC…	783	MKWAALLVFSAALLSTVRGDDFPKLDAAPPKNIDISSITPVLDMDTDSCLPSAAISRSGQQNGGLKPTGKITGGCRRGDFMDFSNTYHRYACVNGNGNQYCGHFFAYYFLKDQAVPTFGGGHRHDLEQIGIWTVNGRVTHGGFSAHGKMENRPVDQIPQEGGRLKFVYHKDGVVTHAIRFGKTNEGAENPTGAFVVPTLVSWFTMKGDTIDNAGLRNNLNSFDYGNANMPIKDNNFLSNLNKFRPSDFPEFTQESIDTSQ*	261	19	34-243	Necrosis
8	PyolNLP8	PYOLI_00013114-RA	NAJK01000055.1	ATGAAGTGGTCTGCCATCCTCGTCGTGTGTCTCGCCGCCGCCCTCGATTCCGTCCACGCGGATGACTTTCCCAAGCTCGATGAAGCCTTGCCTCGTAACATCGACATTCGTGGCATCACGCCGCTAATTGATACGGATACTGATTCGTGCTTGCCAAGCGCCATGATCAGCCGCACTGGCCAGCAGAACGGTGGGCTGGCGCCAGCGTGGGCCAGTTTGGTCAAGGGCTGCCGTAACAACGACTTCTTGAACCTCTCCAACACGTACCACCGCTACGCCTGTAAGAACAGCGATGGGCGTCAGTACTGCGCACATTTGTTCGCGTATTATTTCCTCAAGGACCAGTCGGTGAACCTCATTCCAAGCGGTCACAAGAACGATTTGGAGCAAGTCGCGGTC…	768	MKWSAILVVCLAAALDSVHADDFPKLDEALPRNIDIRGITPLIDTDTDSCLPSAMISRTGQQNGGLAPAWASLVKGCRNNDFLNLSNTYHRYACKNSDGRQYCAHLFAYYFLKDQSVNLIPSGHKNDLEQVAVWTIDGRISHGSFSAHVKLQTKPADQLDKQEGHLKFVYHKDGGLTHCFRFAKPNEVAENPAGAWVLPTLVSWYTMQGDGIDNAGLRDKFNNYDYGTASLQIKVRLPLEHQHVPTIRVSRVLGR*	256	20	36-243	No
9	PyolNLP9	PYOLI_00013117-RA	NAJK01000055.1	ATGAAACCAGCCACATTCCTCACTTTTCTCGCTATCGGTCTCCAGGCCACCGCCACCTACGCCCACGACTTCCCCAAGATGGACGAAGCCTTGCCCAAGAACATCGACATCCGCTCGATTACTCCTCTGCTTGACTTTGATGAGGACTCGTGCCTCCCGAGCACGGCTGTAAGCCGCGAGGGTAAGCAGAACGGTGGTCTCAAGACGACTGGTAACATCGCCGGAGGCTGTCGGGATAAGGAAGACTTCCTGGAGTACTCCAACACTTACTATCGCTACGTGTGCGCCAACTACGAAGGGAAGAAATACTGTGGTCACATGTTTGCGCTCTACTTCCAGAAGGACCAGGCGACTCTTCTTGGCTTGGGCCATCGTCACGACTGGGAACATGTGACAGTG…	798	MKPATFLTFLAIGLQATATYAHDFPKMDEALPKNIDIRSITPLLDFDEDSCLPSTAVSREGKQNGGLKTTGNIAGGCRDKEDFLEYSNTYYRYVCANYEGKKYCGHMFALYFQKDQATLLGLGHRHDWEHVTVWTTDGIVTHGSASAHGGGKTASFGAIPNEDQHLLFVYHKDDVQTHAMRFADADDQAEAENPYKQFVLPPVVSWYSMQGDGALDNETLRNMMNGLNFGSAHCPLLDGDFLRNLNSLKPEGYPTFTDADMIQSK*	266	21	36-248	No
10	PyolNLP10	PYOLI_00013120-RA	NAJK01000055.1	ATGCACTGGACGACTCTGTTTGCTGTGGTTGCCGCTGCGCTTCACGCTTCTGTGGCGACTGCCGAGAACCTCCCGAAGCTAAACGCATCTGTTCCAGTAAAATTCAAGTTCCAGTCTATCCTTCCGCTGTTCGATATGGATTCGGACTCGTGTTACCCGAGTGCAGCGATTAGTCGGAAGGGCGAGCCGAATCTAGGTCTTCAAGGCGTCAGTGTCGACGATTGCCGCAACAAGGACTTTATGGACTACTCCAACACGTACCATCGATATGCATGTCAGCAGATCAACCGCAATTGGCTCTGTGGGCACATGTTCGCGCTCTACTTTGAGAAGGAGACAGCGGGTTCTGCACACCCTCACGACTTCCACTACGTTGTGATCTGGACCATGGGGCTCACG…	786	MHWTTLFAVVAAALHASVATAENLPKLNASVPVKFKFQSILPLFDMDSDSCYPSAAISRKGEPNLGLQGVSVDDCRNKDFMDYSNTYHRYACQQINRNWLCGHMFALYFEKETAGSAHPHDFHYVVIWTMGLTVTHATAFSKGKPLTKPYMSTDVAKELNRVKFVFHEEGSSRHALRFADPSGDKTAENENGYFVLPAVVSWHTMQGEAGIDNRKMIEKMNALGFENVPNPMADEHFLKNMNAGRPAEYPELNEVSLKVSL*	262	21	33-244	No
11	PyolNLP11	PYOLI_00013121-RA	NAJK01000055.1	ATGAAGTGGACCGTGATTTTCGCTATGCTTACCGGTATGCTTGCTGGGGTCTCGCACGCTGAAAGCCTCCCCAAGCTCAAGCAGGCACTGCCCAAGAACATCAACATCAAGTCAATCACTCCATTGCTCGATATGGATAATGACTCGTGCTACCCAGCCGCAGTAGTCGGTTCAAAGGGCGAGGTGAACAAGGGCATCGACCCTCCACGCTCTGAAGTCTCAGATTGCCAGAACCCCAACTTTCTGGAGCACTCCAACACGTACCATCGCTATGCGTGTACTGCTCGTGGCGGCGTCAAATTTTGTGGGCACATCTTTGCGTATTACTTTGAGAAGGAGACGGTGGGCTATAAGCATGCCCACGACTTCCAGTACGTCATTATTTGGACGGAAGGTGAC…	792	MKWTVIFAMLTGMLAGVSHAESLPKLKQALPKNINIKSITPLLDMDNDSCYPAAVVGSKGEVNKGIDPPRSEVSDCQNPNFLEHSNTYHRYACTARGGVKFCGHIFAYYFEKETVGYKHAHDFQYVIIWTEGDRVTYVSAMSHLEADTKSINDSDVAKEGTNVKFVLHTEGSSRHAIRFAGRSKDRVAENKKGFFVLPDVVSWYTMTCEGSDNAKLRATMNTLGFSSSRSTNPISDGVFLKNLNNARPKHFPEFNDESEKNSQ*	264	20	35-246	No
12	PyolNLP12	PYOLI_00013122-RA	NAJK01000055.1	ATGAAGACTCTGACCGCTTTGACGCTCTGTGTGGCTGGGTTGGGTCGGTTTGAACCGGCAGTTGCCCACGATTTCCCAAAATTGGACGCTGCTCTGCCGCTCAACGTGGATATCTCGGCCATATCGCCCGTGATGGACACAGACAAGGACTCGTGCTTGCCAAGCGCCGCTATCAGTCGCACTGGTGACCAGAATGGCGGGCTCAAGCCGACGGGGAAAATGACTGGAGGCTGCTACAACGCAGACTTTATGAACCTCTCCAACTCATATCATCGCTACGCGTGCCTCATGAGCGGTACAACGCGGTATTGTGGTCATTTCTTCGCGTACTACTTCCAAAAGGACCAGCTGTTCGATTATATCGAGAGTGGCCATCGTCACGACTTTGAGCATGTCGCT…	792	MKTLTALTLCVAGLGRFEPAVAHDFPKLDAALPLNVDISAISPVMDTDKDSCLPSAAISRTGDQNGGLKPTGKMTGGCYNADFMNLSNSYHRYACLMSGTTRYCGHFFAYYFQKDQLFDYIESGHRHDFEHVAVWTTNGTVTHGTYSTHGDMVTKAASEIPNQDGHLKFVYHKDGVQTRCFRFAKTNEAAENPQKTFVLPTVVSWYTMKGDGIDNADLRSKFNGYDFGSAHNPIKDGDFLPNLNEGKPTSYPVFTQASVDGSQ*	264	22	37-246	No
13	PyolNLP13	PYOLI_00014460-RA	NAJK01000068.1	ATGAAGCTCCATGTTGCTCTCCTGATCCTCCTCACGTCTTCGCCCTCGACTGCCACGCCCCATGGTACACTCAGCACCGCCCTGCCCAAGAACGTCGACATCTCCGACATCACACCGCTCTTTGACTTTGACACGGACTCGTGCTACCCGAGCTCCGCCTTCAACTCCCAAGGCGAGCTAAACAAAGGACTTCGACTCACGGGTGGCGTCGCCAGTGGATGTCGTCCGACCAACTTCCTCGACAGTTCCAACACGTATCATCGATACGCGTGTTTGAAGACCGCCGACAACACAAGTTATTGTGGTCACATGTTTGCGTTGTACTTTGAGAAGGATCAGGTGATGCCCTTGTTCAGTATCCTGGGCCATCGACATGACTTTGAGCATGCGATCGTTTGG…	792	MKLHVALLILLTSSPSTATPHGTLSTALPKNVDISDITPLFDFDTDSCYPSSAFNSQGELNKGLRLTGGVASGCRPTNFLDSSNTYHRYACLKTADNTSYCGHMFALYFEKDQVMPLFSILGHRHDFEHAIVWTTNGNVTHGSASTHGRSRTKRARKIPREGQHLKFVYHKASVLTHSMRFAMKHDVEAENSYGRFVLPSVVSWYTMHGNVSLDNEKMRTLVDHSTFGDAHHPELEGDFVRNLNKARPFDYPIFAEESKRSSE*	264	18	33-246	No
14	PyolNLP14	PYOLI_00014464-RA	NAJK01000068.1	ATGCATGGACTCTATGCGAGTCTGGTTCTCCTTTTCGCATTGATGAGCACGACCTCGTCCGCGAAGCTGGACCCGACGTGGCCCAAGAACATCAACATCTCGGAGATCACGCCGCTCTTCGATTTTGACCAAGACTCGTGCTACCCGAGCATCGCGTTTGACCGCCACGGCGAGCAGAGTGGCGGACTGAAACCCACAGGGCCCCTCACAGGCGGCTGTCGTCCGCACAACTTCCTCGACAACTCCAACACTTATCACCGCTATGCGTGCATGAAAGACAGCAATGTGACGTATTGCGGACACATGTTCACGCTCTACTTCCAGAAGGACCAGGTCATGCCGTTCTTCAGTCTCTTTGGTCATCGTCACGACTTTGAAGAGGTGATTGTGTGGACGATC…	519	MHGLYASLVLLFALMSTTSSAKLDPTWPKNINISEITPLFDFDQDSCYPSIAFDRHGEQSGGLKPTGPLTGGCRPHNFLDNSNTYHRYACMKDSNVTYCGHMFTLYFQKDQVMPFFSLFGHRHDFEEVIVWTITDQACREDPQGRPASQVCVPQGGIVHPFDALCHEERRRN*	173	21	32-151	No
15	PypeNLP1	PYPLO_00002561-RA	scaffold_5	ATGAAGACTCTGACCGCTTTGACGCTCTGTGTGGCTGCGTTGGGTCGGTTTGAACCGGCAGTTGCCCACGATTTCCCAAAATTGGACGCTGCTCTGCCGCTCAACGTGGATATCTCGGCCATATCGCCCGTGATGGACACAGACAAGGACTCGTGCTTGCCAAGCGCCGCTATCAGTCGCACTGGTGAGCAGAATGGCGGGCTCAAGCCGACGGGGAAAATGACTGGAGGCTGCTACAACGCAGACTTTATGGACCTCTCCAACTCATATCATCGCTACGCGTGCCTCATGAGCGGTCCAACGCGGTATTGTGGTCATTTCTTCGCGTACTACTTCCAAAAGGACCAGCTTTTCGATTATATCGAGAGTGGCCATCGTCACGACTTTGAGCATGTCGCT…	792	MKTLTALTLCVAALGRFEPAVAHDFPKLDAALPLNVDISAISPVMDTDKDSCLPSAAISRTGEQNGGLKPTGKMTGGCYNADFMDLSNSYHRYACLMSGPTRYCGHFFAYYFQKDQLFDYIESGHRHDFEHVAVWTTNGTVTHGTYSTHGDMVTKAASEIPNQDGHLKFVYHKDGVQTRCFRFAKTNEAAENPQKTFVLPTVVSWYTMKGDGIDNAGLRSKLNGYDFGSAHNPIKDGDFLPNLNEGKPTSYPVFTQASVDGSQ*	264	22	37-246	No
16	PypeNLP2	PYPLO_00002562-RA	scaffold_5	ATGAAGTGGACCGTGATTTTCGCTATGCTTACCGGCATGCTTGCTGGGGTCTCGCACGCTGAAAGCCTCCCCAAGCTCAAGCAGGCACTGCCCAAGAACATCGACATCAAGTCAATCACTCCATTGCTCGATATGGATGAAGACTCGTGCTACCCAGCCGCAGTGGTCGGTTCAAAGGGCGAGGTGAACAAGGGCATCGACCCTCCACGCTCTGAAGTCTCAGATTGCCAGAACCCCAACTTTCTGGAGCACTCCAACACGTACCATCGCTATGCGTGTACTGCTCGTGACGGCGTCAAATTTTGTGGGCACATCTTTGCGTATTACTTTGAGAAGGAGACGGTGGGCTATAAGCATGCCCACGACTTCCAGTACGTCATTATTTGGACGGAAGGTGAC…	792	MKWTVIFAMLTGMLAGVSHAESLPKLKQALPKNIDIKSITPLLDMDEDSCYPAAVVGSKGEVNKGIDPPRSEVSDCQNPNFLEHSNTYHRYACTARDGVKFCGHIFAYYFEKETVGYKHAHDFQYVIIWTEGDRVTYVSAMSHLEADTKRINDSDVAKEGTNVKFVLHTEGSSRHAIRFAGRSKDRVAENKKGFFVLPDVVSWYTMTCEGSDNAKLRATMNTLGFSSSRSTNPISDGVFLKNLNNARPKHFPEFNDESEKNSQ*	264	20	35-246	No
17	PypeNLP3	PYPLO_00002563-RA	scaffold_5	ATGCACTGGACGACTCTGTTTGCTGTGGTTGCCGCTGCGCTTCACGCTTCTGTGGCGACTGCCGAGAACCTCCCGAAGCTAAACGCATCTGTTCCAGTAAAATTCAAGTTCCAGTCTATCCTTCCGCTGTTCGATATGGACAAGGACTCGTGTTACCCGAGTGCAGCGATTAGTCGGAAGGGCGAGCCGAATCTAGGTCTTCAAGGCGTCAGTGTCGACGATTGCCGCAACAAGGACTTTATGGACTACTCCAACACGTACCATCGATATGCGTGTCAGCAGATCAACCGCAATTGGCTCTGTGGGCACATGTTCGCGCTCTACTTTGAGAAGGAGACAGCGGGTTCTGCACACCCTCACGACTTCCACTACGTTGTGATCTGGACCATGGGGCTCACG…	786	MHWTTLFAVVAAALHASVATAENLPKLNASVPVKFKFQSILPLFDMDKDSCYPSAAISRKGEPNLGLQGVSVDDCRNKDFMDYSNTYHRYACQQINRNWLCGHMFALYFEKETAGSAHPHDFHYVVIWTMGLTVTHATAFSKGKPLTKPYMSTDVAKELNRVKFVFHEEGSSRHALRFADPSGDKTAENENGYFVLPAVVSWHTMQGEAGIDNKKMIEKMNALGFENVPNPMADEHFLKNMNAGRPVEYPELNEVSLKVSL*	262	21	33-243	No
18	PypeNLP4	PYPLO_00002565-RA	scaffold_5	ATGAAGTTCGCCTCGATTCTCGCTTTCCTCACCGTCGGAATTCAAGTGAGTATCACACAAGCCCACGACTTTCCCCGATTAGATGAAGCCATGCCAAAGGGCATCGACATCAAGGCCATCTTGCCACTACTTGACTTCGACGACGACTCGTGCTATCCCAGCGCGGCTGTGAGTCGAGTGGGTCGCCAGAACGGTGGTCTTCGGACCACAGGTTCCATCACAGGCGGTTGCCGCAACAAAGAGTTCCTCGACTACTCAAACTCGTACCACCGCTATGCGTGTCGAGACCACGAGAAGAAGAAATACTGCGGCCACATGTTTGCTCTGTATTTCCAGAAGGATCAAATGGTCGACGGACTGGACCCTTTCGGACACCGTCACGACTTTGAATATGTCGCT…	801	MKFASILAFLTVGIQVSITQAHDFPRLDEAMPKGIDIKAILPLLDFDDDSCYPSAAVSRVGRQNGGLRTTGSITGGCRNKEFLDYSNSYHRYACRDHEKKKYCGHMFALYFQKDQMVDGLDPFGHRHDFEYVAVWTTDGVVTHGSASAHGDAAVKPIDQIPHSGEHIKFVFHKDEPTTHSMRFAEKNHDEDAENSYGDFVLPAVVSWYTMQGDGNMTNDALRGLMNSLDFGDAHNPLLDGDFLDNLNEAKPKEYPQFDDEDVKGSQ*	267	21	37-249	Chlorotic
19	PypeNLP5	PYPLO_00002566-RA	scaffold_5	ATGAAACCAGCCACATTCCTCACTTTTCTCGCTATCGGTCTCCAGGCCACCGCCACCTACGCCCACGACTTCCCCAAGATGGACGAAGCCTTGCCCAAGAACATCGACATCCGCTCGATTACTCCTCTGCTTGACTTTGATGAGGACTCGTGCCTCCCGAGCACGGCTGTAAGCCGCGAGGGTAAGCAGAACGGTGGTCTCAAGACGAGTGGTAACATCGCTGGAGGCTGTCGGGATAAGGAAGACTTCCTGGAGTACTCCAACACTTACCATCGCTACGTGTGCGCCAACTACGAAGGGAAGAAATACTGTGGTCACATGTTTGCGCTCTACTTCCAGAAGGACCAGGCGACTCTTCTTGGCTTGGGCCATCGTCACGACTGGGAGCATGTGACAGTG…	798	MKPATFLTFLAIGLQATATYAHDFPKMDEALPKNIDIRSITPLLDFDEDSCLPSTAVSREGKQNGGLKTSGNIAGGCRDKEDFLEYSNTYHRYVCANYEGKKYCGHMFALYFQKDQATLLGLGHRHDWEHVTVWTTDGIVTHGSASAHGGGKTASFDAIPNEDQHLLFVYHKDDVQTHAMRFADADDQAEVENPYLQFVLPPVVSWYSMQGDGALDNETLRNMMNRLNFGSAHCPLLDGDFLRNLNSLKPEGYPTFTDADMIQSK*	266	18	33-246	Chlorotic
20	PypeNLP6	PYPLO_00002569-RA	scaffold_5	ATGAAGTGGTCTGCCATCCCCGCCGTGTGTCTCGCCGCCGCCCTCGATTCCGTCCACGCGGATGATTTTCCCAAGCTCGATGAAGCCTTGCCTCGTAACATCGACATTCGTGGCATCACGCCGCTAATTGATACGGATACTGATTCGTGCTTGCCAAGCGCCATGATCAGCCGCACTGGCCAGCAGAACGATGGGCTGGCGCCAGCGTGGGGCAGTTTGGTCAAGGGCTGCCGTAACAACGACTTCTTGAACCTCTCCAACACGTACCACCGCTACGCCTGTAAGAACAGCGATGGGCGTCAGTACTGTGCACATTTGTTCGCGTATTATTTCCTCAAGGACCAGTCGGTGAACCTCATTCCAAGCGGTCACAAGAACGATTTGGAGCAAGTCGCGGTC…	528	MKWSAIPAVCLAAALDSVHADDFPKLDEALPRNIDIRGITPLIDTDTDSCLPSAMISRTGQQNDGLAPAWGSLVKGCRNNDFLNLSNTYHRYACKNSDGRQYCAHLFAYYFLKDQSVNLIPSGHKNDLEQVAVWTIDGRILHGSSVRTVSSRQNRPTSWTSKTAISSLCTTRTVA*	176	20	36-173	No
21	PypeNLP7	PYPLO_00002570-RA	scaffold_5	ATGAATACGAGTCCATCCCGCGATGTCCTGATTGCGTGCACAGCCATCGCCATTCTCCATTTTGCTTCATCCTGCCAACTCGACGACCTTCCCAAGTGCAAACCAATGAAGTGGATCGCCTTGCTCGCTTCTATCGCCTTGCTCGGCCGTGTTCGTGGTGATGATTTCCCCAAGCTCGATGCCGCGCCACCCAAGAACATCGATATCTCGTCCATCACGCCAGTTCTCGACATGGACACGGACTCGTGTCTTCCAAGTGCCGCCATCAGTCGTACTGGGGCCCAGAACGGAGGTCTCAACCCAAGCGGAAGTATCACTGGCGGCTGCCGACGCTCGGATTTCATGAACTATTCCAACACGTACCACCGTTACGCGTGTATCAGCAGCAACGGTAACCAG…	2553	MNTSPSRDVLIACTAIAILHFASSCQLDDLPKCKPMKWIALLASIALLGRVRGDDFPKLDAAPPKNIDISSITPVLDMDTDSCLPSAAISRTGAQNGGLNPSGSITGGCRRSDFMNYSNTYHRYACISSNGNQYCGHFFAYYFLKDQVLSTVGGGHRHDIEQVGIWTTNGRVTHGGFSAHGAMTNLPANQIPQEGGRLKFVYHKDGVATHAIRFAKTNEAVENPTGAFVVPTLVSWFTMKADSINNAGLRNNLNSFDYGNANMPIKDSNFLNSLNKFRPAEYPFAENPAGTFVTPTLVSWYTMKGDGIDNGGLRDKMNNYNYGSASMPIKDGSFLNNVNTYKPGEFPTFTQDSWSAILSLCVAAVLGSAHADDFPKLDEAMPKNVDIRGITPVIDTDMD…	851	24	68-277, 387-595, 624-833	No
22	PypeNLP8	PYPLO_00002572-RA	scaffold_5	ATGAAGCTTTTGACGATCCTCTCCGTCGTATGCGCTGCTGTCGCTGGCTCTGTGCGCGCTGATGACTTCCCAAAGCTCGATGAAGCCTGGCCCAAGAACGTGGACATCCGCTCGATCACGCCGGTGTTTGATATGGACACGGATTCGTGTTTGCCAAGCGCCATGGTGAGTCGCACTGGTCAGCAGAACGGAGGTCTCAAGCCAAGCGGTCAGATCGTCGGCAAGTGCTACAACCACGACTTTATGAATCTCTCCAACTCGTACCACCGCTACGCTTGCCAGAACAGTAATGGAAGCCAGTACTGCGCGCATTTGTTCGCGTACTACTTCCTCAAGGACCAGAAGATCAACTTCATCGAGAGTGGACATCGTCACGACTTGGAGCAGCTCGCAGTCTGG…	786	MKLLTILSVVCAAVAGSVRADDFPKLDEAWPKNVDIRSITPVFDMDTDSCLPSAMVSRTGQQNGGLKPSGQIVGKCYNHDFMNLSNSYHRYACQNSNGSQYCAHLFAYYFLKDQKINFIESGHRHDLEQLAVWTINGRVSHGSYSAHGKMYAKAASDIPNQDGHLKFVYHKDGAGTHAFRFAKNNEDAENPLRTFVFPTVVSWYTMKGDGIDNAGLRDKMNSYNYGSATMPIKDSTFLNNINNFRPSGFPVFTQDSVNNSQ*	262	20	35-244	Chlorotic
23	PypeNLP9	PYPLO_00012730-RA	scaffold_71	ATGCATGGACTCTATGCGAGTCTCGTTCTCCTGTTCGCATTGATGAGCACGACCTCGTCCGCGAAGCTGGACCCGACGTGGCCCAAGAACATCAATATCTCGGAGATCACGCCGCTCTTCGATTTTGACCAAGACTCGTGCTACCCGAGCATCGCGTTTGACCGCCACGGCGAGCAGAGTGGCGGACTGAAACCCACAGGGTCCCTCACAGGCGGCTGTCGTCCGCACAACTTCCTCGACAACTCCAACACTTATCACCGCTATGCGTGCTTGAAAGACAGCAATGTGACGTATTGCGGACACATGTTCACGCTCTACTTCCAGAAGGACCAGGTCATGCCGTTCTTCAGTCTCTTTGGTCATCGTCACGACTTTGAAGAGGTGATTGTGTGGACGATC…	786	MHGLYASLVLLFALMSTTSSAKLDPTWPKNINISEITPLFDFDQDSCYPSIAFDRHGEQSGGLKPTGSLTGGCRPHNFLDNSNTYHRYACLKDSNVTYCGHMFTLYFQKDQVMPFFSLFGHRHDFEEVIVWTIDGNVTHGSASAHGRSRTKRAEKIPREGQHLKFVYHKEGLFTHSMRFAMKKDVETENSYGAFVLPPLVSWYTMQGDGPIDNQELRGRFNRCTFGGAHQPELDGDFVRNLNEARPYDYPEFTEKSMSMSK*	262	21	32-244	No
24	PypeNLP10	PYPLO_00012734-RA	scaffold_71	ATGAAGCTCCATGTTGCTCTCCTGATCCTCCTCACGTCTTCGCCCTCGACTGCCACGCCCCACGGTACACTCAGCACCGCCCTCCCCAAGAACGTCGACATCTCCGACATCACACCGCTCTTTGACTTTGACACGGACTCGTGCTACCCGAGCTCCGCCTTCAACTCCCAAGGCGAGCTAAACAAAGGACTTCGACTCACGGGTGGCGTCGCCAGTGGATGTCGTCCGACCAACTTCCTCGACAGTTCCAACACGTATCATCGATACGCGTGTTTGAAGACCGCCGACAACACAAGTTATTGTGGTCACATGTTTGCGTTGTACTTTGAGAAGGATCAGGTGATGCCCTTGTTCAGTATCCTGGGCCATCGACATGACTTTGAGCATGCGATCGTTTGG…	792	MKLHVALLILLTSSPSTATPHGTLSTALPKNVDISDITPLFDFDTDSCYPSSAFNSQGELNKGLRLTGGVASGCRPTNFLDSSNTYHRYACLKTADNTSYCGHMFALYFEKDQVMPLFSILGHRHDFEHAIVWTTNSNVTHGSASTHGRSRTKRARKIPREGQHLKFVYHKASVLTHSMRFAMKHDVEAENSYGRFVLPSVVSWYTMHGNVSLDNEQMRTLVDHSTFGDAHHPELEGDFVRNLNKARPFDYPIFTEESKRRSQ*	264	18	33-246	No
25	PypeNLP11	PYPLO_00012735-RA	scaffold_71	ATGAAGCTCCATGTTGCTCTCCTGATCCTCCTCACGTCTTCGCCCTCGACTGCCACGCCCCACGGTACACTCAGCACCGCCCTCCCCAAGAACGTCGACATCTCCGACATCACACCGCTCTTTGACTTTGACACGGACTCGTGCTACCCGAGCTCCGCCTTCAACTCCCAAGGCGAGCTAAACAAAGGACTTCGACTCACGGGTGGCGTCGCCAGTGGATGTCGTCCGACCAACTTCCTCGACAGTTCCAACACGTATCATCGATACGCGTGTTTGAAGACCGCCGACAACACAAGTTATTGTGGTCACATGTTTGCGTTGTACTTTGAGAAGGATCAGGTGATGCCCTTGTTCAGTATCCTGGGCCATCGACATGACTTTGAGCATGCGATCGTTTGG…	792	MKLHVALLILLTSSPSTATPHGTLSTALPKNVDISDITPLFDFDTDSCYPSSAFNSQGELNKGLRLTGGVASGCRPTNFLDSSNTYHRYACLKTADNTSYCGHMFALYFEKDQVMPLFSILGHRHDFEHAIVWTTNSNVTHGSASTHGRSRTKRARKIPREGQHLKFVYHKASVLTHSMRFAMKHDVEAENSYGRFVLPSVVSWYTMHGNVSLDNEQMRTLVDHSTFGDAHHPELEGDFVRNLNKARPFDYPIFTEESKRRSQ*	264	18	33-246	No
Notes: N. benthamiana leaves were transformed with constructs harboring the indicated effectors by agroinfiltration. Gene locus indicates the localization of individual effector gene in sequenced geneome of P. oligandrum and P. periplocum.Signal peptide was predicted by SignalP 3.0. Necrosis/chlorotic-inducing activity was decided from three independent experiments.
