# Supplementary material for: Type 2 Nep1-Like Proteins from the Biocontrol Oomycete Pythium oligandrum Suppress Phytophthora capsici Infection in Solanaceous Plants
Source: J Fungi (Basel). 2021 Jun 22;7(7):496. doi: 10.3390/jof7070496 (PMC8303654; doi:10.3390/jof7070496)
Supplement: Supplementary file 1 [file jof-07-00496-s001.zip › Supplementary Table 2.xlsx]

## Sheet: Sheet2
Supplementary Table 2 Collinearity analysis of the left and right arms of NLP clustered region
Scafold	NAJK01000055.1	scf1117875581352	direction:minus
	Aliged genes		log(E-value)
Left arm	PYOLI_00013076	PYU1_T014627	-50
	PYOLI_00013084	PYU1_T014629	-7
	PYOLI_00013085	PYU1_T014630	-60
	PYOLI_00013086	PYU1_T014631	-200
	PYOLI_00013087	PYU1_T014632	-100
	PYOLI_00013089	PYU1_T014633	-30
	PYOLI_00013090	PYU1_T014635	-80
	PYOLI_00013091	PYU1_T014636	-200
	PYOLI_00013094	PYU1_T014643	-300
	PYOLI_00013095	PYU1_T014644	-300
	PYOLI_00013096	PYU1_T014645	-60
	PYOLI_00013103	PYU1_T014649	-100
	PYOLI_00013105	PYU1_T014650	-10000
	PYOLI_00013106	PYU1_T014652	-30
	PYOLI_00013107	PYU1_T014654	-30
Scafold	NAJK01000055.1	scf1117875581352	direction:plus
	Aliged genes		log(E-value)
Right arm	PYOLI_00013129	PYU1_T014314	-30
	PYOLI_00013133	PYU1_T014310	-20
	PYOLI_00013134	PYU1_T014307	-20
	PYOLI_00013136	PYU1_T014302	-4
	PYOLI_00013141	PYU1_T014298	-20
	PYOLI_00013147	PYU1_T014106	-40
	PYOLI_00013149	PYU1_T014295	-100
	PYOLI_00013150	PYU1_T014294	-200
	PYOLI_00013151	PYU1_T014293	-100
	PYOLI_00013152	PYU1_T014291	-100
	PYOLI_00013154	PYU1_T014290	-30
	PYOLI_00013162	PYU1_T014288	-100
	PYOLI_00013167	PYU1_T014286	-7
