# Supplementary material for: Type 2 Nep1-Like Proteins from the Biocontrol Oomycete Pythium oligandrum Suppress Phytophthora capsici Infection in Solanaceous Plants
Source: J Fungi (Basel). 2021 Jun 22;7(7):496. doi: 10.3390/jof7070496 (PMC8303654; doi:10.3390/jof7070496)
Supplement: Supplementary file 1 [file jof-07-00496-s001.zip › Supplementary Table 3.xlsx]

## Sheet: Sheet1
Supplementary Table 3 Primers used in this study.
	Primer names	Primer sequence	Application
1	pBin3HA-PyolNLP1-Sma1-F	CGATAGGGTACCCCCATGGCAGTCCGTTGCTTG	Clone gene to pBin3HA vector for expression in N. benthamiana
2	pBin3HA-PyolNLP1-Sma1-R	GGATCCGTCGACCCCTTGCGAGCTCTTGATGTC	Clone gene to pBin3HA vector for expression in N. benthamiana
3	pBin3HA-PyolNLP2-Sma1-F	CGATAGGGTACCCCCATGAAGCTTTTGACGATC	Clone gene to pBin3HA vector for expression in N. benthamiana
4	pBin3HA-PyolNLP2-Sma1-R	GGATCCGTCGACCCCCTGCGAGTTGTTGACACT	Clone gene to pBin3HA vector for expression in N. benthamiana
5	pBin3HA-PyolNLP3-Sma1-F	CGATAGGGTACCCCCATGAACTGGTCCGCCATG	Clone gene to pBin3HA vector for expression in N. benthamiana
6	pBin3HA-PyolNLP3-Sma1-R	GGATCCGTCGACCCCCTGGGAGTTGTTCACGCT	Clone gene to pBin3HA vector for expression in N. benthamiana
7	pBin3HA-PyolNLP4-Sma1-F	CGATAGGGTACCCCCATGAAGTGGATTGCCTTG	Clone gene to pBin3HA vector for expression in N. benthamiana
8	pBin3HA-PyolNLP4-Sma1-R	GGATCCGTCGACCCCCTGAGAGTTGTCGACGCT	Clone gene to pBin3HA vector for expression in N. benthamiana
9	pBin3HA-PyolNLP5-Sma1-F	CGATAGGGTACCCCCATGAACTGGTCCGCCATC	Clone gene to pBin3HA vector for expression in N. benthamiana
10	pBin3HA-PyolNLP5-Sma1-R	GGATCCGTCGACCCCCTGGGAGTTGTTCACACT	Clone gene to pBin3HA vector for expression in N. benthamiana
11	pBin3HA-PyolNLP6-Sma1-F	CGATAGGGTACCCCCATGAAGTGGTCCGCCATC	Clone gene to pBin3HA vector for expression in N. benthamiana
12	pBin3HA-PyolNLP6-Sma1-R	GGATCCGTCGACCCCCTGAGAGTTCTTTGCATG	Clone gene to pBin3HA vector for expression in N. benthamiana
13	pBin3HA-PyolNLP7-Sma1-F	CGATAGGGTACCCCCATGAAGTGGGCCGCGCTC	Clone gene to pBin3HA vector for expression in N. benthamiana
14	pBin3HA-PyolNLP7-Sma1-R	GGATCCGTCGACCCCCTGGGAGGTGTCGATACT	Clone gene to pBin3HA vector for expression in N. benthamiana
15	pBin3HA-PyolNLP8-Sma1-F	CGATAGGGTACCCCCATGAAGTGGTCTGCCATC	Clone gene to pBin3HA vector for expression in N. benthamiana
16	pBin3HA-PyolNLP8-Sma1-R	GGATCCGTCGACCCCTCGTCCGAGAACTCTGGA	Clone gene to pBin3HA vector for expression in N. benthamiana
17	pBin3HA-PyolNLP9-Sma1-F	CGATAGGGTACCCCCATGAAACCAGCCACATTC	Clone gene to pBin3HA vector for expression in N. benthamiana
18	pBin3HA-PyolNLP9-Sma1-R	GGATCCGTCGACCCCCTTCGATTGGATCATGTC	Clone gene to pBin3HA vector for expression in N. benthamiana
19	pBin3HA-PyolNLP10-Sma1-F	CGATAGGGTACCCCCATGCACTGGACGACTCTG	Clone gene to pBin3HA vector for expression in N. benthamiana
20	pBin3HA-PyolNLP10-Sma1-R	GGATCCGTCGACCCCCAGAGAGACCTTGAGGCT	Clone gene to pBin3HA vector for expression in N. benthamiana
21	pBin3HA-PyolNLP11-Sma1-F	CGATAGGGTACCCCCATGAAGTGGACCGTGATT	Clone gene to pBin3HA vector for expression in N. benthamiana
22	pBin3HA-PyolNLP11-Sma1-R	GGATCCGTCGACCCCTTGCGAGTTCTTCTCGCT	Clone gene to pBin3HA vector for expression in N. benthamiana
23	pBin3HA-PyolNLP12-Sma1-F	CGATAGGGTACCCCCATGAAGACTCTGACCGCT	Clone gene to pBin3HA vector for expression in N. benthamiana
24	pBin3HA-PyolNLP12-Sma1-R	GGATCCGTCGACCCCTTGCGAACCGTCGACACT	Clone gene to pBin3HA vector for expression in N. benthamiana
25	pBin3HA-PyolNLP13-Sma1-F	CGATAGGGTACCCCCATGAAGCTCCATGTTGCT	Clone gene to pBin3HA vector for expression in N. benthamiana
26	pBin3HA-PyolNLP13-Sma1-R	GGATCCGTCGACCCCTTCTGAGCTGCGTTTGCT	Clone gene to pBin3HA vector for expression in N. benthamiana
27	pBin3HA-PyolNLP14-Sma1-F	CGATAGGGTACCCCCATGCATGGACTCTATGCG	Clone gene to pBin3HA vector for expression in N. benthamiana
28	pBin3HA-PyolNLP14-Sma1-R	GGATCCGTCGACCCCGTTTCGACGTCTTTCTTC	Clone gene to pBin3HA vector for expression in N. benthamiana
29	pBin3HA-PypeNLP1-Sma1-F	CGATAGGGTACCCCCATGAAGACTCTGACCGCT	Clone gene to pBin3HA vector for expression in N. benthamiana
30	pBin3HA-PypeNLP1-Sma1-R	GGATCCGTCGACCCCTTGCGAACCGTCGACACT	Clone gene to pBin3HA vector for expression in N. benthamiana
31	pBin3HA-PypeNLP2-Sma1-F	CGATAGGGTACCCCCATGAAGTGGACCGTGATT	Clone gene to pBin3HA vector for expression in N. benthamiana
32	pBin3HA-PypeNLP2-Sma1-R	GGATCCGTCGACCCCTTGCGAGTTCTTCTCGCT	Clone gene to pBin3HA vector for expression in N. benthamiana
33	pBin3HA-PypeNLP3-Sma1-F	CGATAGGGTACCCCCATGCACTGGACGACTCTG	Clone gene to pBin3HA vector for expression in N. benthamiana
34	pBin3HA-PypeNLP3-Sma1-R	GGATCCGTCGACCCCCAGAGAGACCTTGAGGCT	Clone gene to pBin3HA vector for expression in N. benthamiana
35	pBin3HA-PypeNLP4-Sma1-F	CGATAGGGTACCCCCATGAAGTTCGCCTCGATT	Clone gene to pBin3HA vector for expression in N. benthamiana
36	pBin3HA-PypeNLP4-Sma1-R	GGATCCGTCGACCCCCTGCGAGCCCTTGACATC	Clone gene to pBin3HA vector for expression in N. benthamiana
37	pBin3HA-PypeNLP5-Sma1-F	CGATAGGGTACCCCCATGAAACCAGCCACATTC	Clone gene to pBin3HA vector for expression in N. benthamiana
38	pBin3HA-PypeNLP5-Sma1-R	GGATCCGTCGACCCCCTTCGATTGGATCATGTC	Clone gene to pBin3HA vector for expression in N. benthamiana
39	pBin3HA-PypeNLP6-Sma1-F	CGATAGGGTACCCCCATGAAGTGGTCTGCCATC	Clone gene to pBin3HA vector for expression in N. benthamiana
40	pBin3HA-PypeNLP6-Sma1-R	GGATCCGTCGACCCCAGCCACCGTCCTTGTGGT	Clone gene to pBin3HA vector for expression in N. benthamiana
41	pBin3HA-PypeNLP7-Sma1-F	CGATAGGGTACCCCCATGAATACGAGTCCATCC	Clone gene to pBin3HA vector for expression in N. benthamiana
42	pBin3HA-PypeNLP7-Sma1-R	GGATCCGTCGACCCCCTGGGAGGTGTCGATGCT	Clone gene to pBin3HA vector for expression in N. benthamiana
43	pBin3HA-PypeNLP8-Sma1-F	CGATAGGGTACCCCCATGAAGCTTTTGACGATC	Clone gene to pBin3HA vector for expression in N. benthamiana
44	pBin3HA-PypeNLP8-Sma1-R	GGATCCGTCGACCCCCTGCGAGTTGTTGACACT	Clone gene to pBin3HA vector for expression in N. benthamiana
45	pBin3HA-PypeNLP9-Sma1-F	CGATAGGGTACCCCCATGCATGGACTCTATGCG	Clone gene to pBin3HA vector for expression in N. benthamiana
46	pBin3HA-PypeNLP9-Sma1-R	GGATCCGTCGACCCCTTTCGACATGGACATGCT	Clone gene to pBin3HA vector for expression in N. benthamiana
47	pBin3HA-PypeNLP10-Sma1-F	CGATAGGGTACCCCCATGAAGCTCCATGTTGCT	Clone gene to pBin3HA vector for expression in N. benthamiana
48	pBin3HA-PypeNLP10-Sma1-R	GGATCCGTCGACCCCTTGCGACCTGCGTTTGCT	Clone gene to pBin3HA vector for expression in N. benthamiana
49	pBin3HA-PypeNLP11-Sma1-F	CGATAGGGTACCCCCATGAAGCTCCATGTTGCT	Clone gene to pBin3HA vector for expression in N. benthamiana
50	pBin3HA-PypeNLP11-Sma1-R	GGATCCGTCGACCCCTTGCGACCTGCGTTTGCT	Clone gene to pBin3HA vector for expression in N. benthamiana
51	qPCR-PyolActin-F	ACGACCGGTTGTGTGTTGGACT	qRT-PCR analysis in Py. oligandrium
52	qPCR-PyolActin-R	GTCCGTCAAGTCACGGCCAGC	qRT-PCR analysis in Py. oligandrium
53	qPCR-PyolNLP2F	GCATCGACAATGCTGGTCTT	qRT-PCR analysis in Py. oligandrium
54	qPCR-PyolNLP2R	AGGAACGTGCTGTCCTTGAT	qRT-PCR analysis in Py. oligandrium
55	qPCR-PyolNLP3F	GATCAAGGACAGCACGTTCC	qRT-PCR analysis in Py. oligandrium
56	qPCR-PyolNLP3R	TGGGTGAAGACTGGGAACTC	qRT-PCR analysis in Py. oligandrium
57	qPCR-PyolNLP4F	GACTCGTGTCTTCCAAGTGC	qRT-PCR analysis in Py. oligandrium
58	qPCR-PyolNLP4R	GTAACGGTGGTACGTGTTGG	qRT-PCR analysis in Py. oligandrium
59	qPCR-PyolNLP5F	GTTGGAGCAACCTCACCAAG	qRT-PCR analysis in Py. oligandrium
60	qPCR-PyolNLP5R	AAACAGCAACCTGCTCCAAG	qRT-PCR analysis in Py. oligandrium
61	qPCR-PyolNLP6F	GCTTGACGCACTGCTTTAGA	qRT-PCR analysis in Py. oligandrium
62	qPCR-PyolNLP6R	CCGGCATTGTCGATACCATC	qRT-PCR analysis in Py. oligandrium
63	qPCR-PyolNLP7F	ACGATGAAGGGCGATACCAT	qRT-PCR analysis in Py. oligandrium
64	qPCR-PyolNLP7R	TGGAAAGTCGGATGGACGAA	qRT-PCR analysis in Py. oligandrium
65	pET32a-PyolNLP1-BamH1-F	CCATGGCTGATATCGGATCCATGATTGGTTTCGAGGTA	Clone gene to pET32a vector for expression in E. coli
66	pET32a-PyolNLP1-XhoI-R	GTGGTGGTGGTGGTGGTGCTCGAGTTGCGAGCTCTTGATGTC	Clone gene to pET32a vector for expression in E. coli
67	pET32a-PyolNLP2-BamH1-F	CCATGGCTGATATCGGATCCATGGATGACTTCCCAAAG	Clone gene to pET32a vector for expression in E. coli
68	pET32a-PyolNLP2-XhoI-R	GTGGTGGTGGTGGTGGTGCTCGAGCTGCGAGTTGTTGACACT	Clone gene to pET32a vector for expression in E. coli
69	pET32a-PyolNLP3-BamH1-F	CCATGGCTGATATCGGATCCATGGATGACTTCCCCAAG	Clone gene to pET32a vector for expression in E. coli
70	pET32a-PyolNLP3-XhoI-R	GTGGTGGTGGTGGTGGTGCTCGAGCTGGGAGTTGTTCACGCT	Clone gene to pET32a vector for expression in E. coli
71	pET32a-PyolNLP4-BamH1-F	CCATGGCTGATATCGGATCCATGGATGATTTCCCCAAG	Clone gene to pET32a vector for expression in E. coli
72	pET32a-PyolNLP4-XhoI-R	GTGGTGGTGGTGGTGGTGCTCGAGCTGAGAGTTGTCGACGCT	Clone gene to pET32a vector for expression in E. coli
73	pET32a-PyolNLP5-BamH1-F	CCATGGCTGATATCGGATCCATGGATGACTTCCCCAAG	Clone gene to pET32a vector for expression in E. coli
74	pET32a-PyolNLP5-XhoI-R	GTGGTGGTGGTGGTGGTGCTCGAGCTGGGAGTTGTTCACACT	Clone gene to pET32a vector for expression in E. coli
75	pET32a-PyolNLP6-BamH1-F	CCATGGCTGATATCGGATCCATGGATGACTTCCCCAAG	Clone gene to pET32a vector for expression in E. coli
76	pET32a-PyolNLP6-XhoI-R	GTGGTGGTGGTGGTGGTGCTCGAGCTGAGAGTTCTTTGCATG	Clone gene to pET32a vector for expression in E. coli
77	pET32a-PyolNLP7-BamH1-F	CCATGGCTGATATCGGATCCATGGACGACTTCCCCAAG	Clone gene to pET32a vector for expression in E. coli
78	pET32a-PyolNLP7-XhoI-R	GTGGTGGTGGTGGTGGTGCTCGAGCTGGGAGGTGTCGATACT	Clone gene to pET32a vector for expression in E. coli
79	pET32a-PyolNLP11-BamH1-F	CCATGGCTGATATCGGATCCATGGAAAGCCTCCCCAAG	Clone gene to pET32a vector for expression in E. coli
80	pET32a-PyolNLP11-XhoI-R	GTGGTGGTGGTGGTGGTGCTCGAGTTGCGAGTTCTTCTCGCT	Clone gene to pET32a vector for expression in E. coli
81	pET32a-PypeNLP4-BamH1-F	CCATGGCTGATATCGGATCCATGCACGACTTTCCCCGA	Clone gene to pET32a vector for expression in E. coli
82	pET32a-PypeNLP4-XhoI-R	GTGGTGGTGGTGGTGGTGCTCGAGCTGCGAGCCCTTGACATC	Clone gene to pET32a vector for expression in E. coli
83	pET32a-PypeNLP5-BamH1-F	CCATGGCTGATATCGGATCCATGACCTACGCCCACGAC	Clone gene to pET32a vector for expression in E. coli
84	pET32a-PypeNLP5-XhoI-R	GTGGTGGTGGTGGTGGTGCTCGAGCTTCGATTGGATCATGTC	Clone gene to pET32a vector for expression in E. coli
85	pET32a-PypeNLP8-BamH1-F	CCATGGCTGATATCGGATCCATGGATGACTTCCCAAAG	Clone gene to pET32a vector for expression in E. coli
86	pET32a-PypeNLP8-XhoI-R	GTGGTGGTGGTGGTGGTGCTCGAGCTGCGAGTTGTTGACACT	Clone gene to pET32a vector for expression in E. coli
87	qNbEf1a-F	AGAGGCCCTCAGACAAAC	qRT-PCR analysis in N. benthamiana
88	qNbEf1a-R	TAGGTCCAAAGGTCACAA	qRT-PCR analysis in N. benthamiana
89	qNbCyp71D20-F	GTTGACGCCATTGTTGAG	qRT-PCR analysis in N. benthamiana
90	qNbCyp71D20-R	ATCTTCGCCTCCTAATGC	qRT-PCR analysis in N. benthamiana
91	qNbPti5-F	CCTCCAAGTTTGAGCTCGGATAGT	qRT-PCR analysis in N. benthamiana
92	qNbPti5-R	CCAAGAAATTCTCCATGCACTCTGTC	qRT-PCR analysis in N. benthamiana
93	qNbPR1-F	GTGGACACTATACTCAGGTG	qRT-PCR analysis in N. benthamiana
94	qNbPR1-R	TCCAACTTGGAATCAAAGGG	qRT-PCR analysis in N. benthamiana
95	qNbPR2-F	AGGTGTTTGCTATGGAATGC	qRT-PCR analysis in N. benthamiana
96	qNbPR2-R	TCTGTACCCACCATCTTGC	qRT-PCR analysis in N. benthamiana
97	qNbPR3-F	CAATGCCTTTATCAATGCTG	qRT-PCR analysis in N. benthamiana
98	qNbPR3-R	AGTAGTCACCTGGGCTACCT	qRT-PCR analysis in N. benthamiana
99	qNbPR4-F	GATGCTTGAGGGTGACGA	qRT-PCR analysis in N. benthamiana
100	qNbPR4-R	ATAGCCCACTCCATTTGT	qRT-PCR analysis in N. benthamiana
101	qNbPDF1.2-F	CTTCAAGCAAAGCTGCAGCCAAAG	qRT-PCR analysis in N. benthamiana
102	qNbPDF1.2-R	CTATGCACTAAGCCATGTGTGTTTG	qRT-PCR analysis in N. benthamiana
103	qNbEIN3-F	TCACTCGGAAGAGGAAGC	qRT-PCR analysis in N. benthamiana
104	qNbEIN3-R	TGCGGACATTGAAGACAC	qRT-PCR analysis in N. benthamiana
105	qNbLOX-R	TCTAAGCTCATAAGCAATGG	qRT-PCR analysis in N. benthamiana
106	qNbLOX-F	CCTTAAGAGGAGATGGAACT	qRT-PCR analysis in N. benthamiana
107	qNbEDS1-F	AATGAGGTGGAGAAGGCGAT	qRT-PCR analysis in N. benthamiana
108	qNbEDS1-R	GTCACCAACAAGAGGGCATC	qRT-PCR analysis in N. benthamiana
109	qNbDef1.5-F	CTTTGGCTTCGCTGCTG	qRT-PCR analysis in N. benthamiana
110	qNbDef1.5-R	GAACAAAGGAAACGATTAC	qRT-PCR analysis in N. benthamiana
111	qNbDef2.1-F	AAAAGCTTGTATCAGTGAG	qRT-PCR analysis in N. benthamiana
112	qNbDef2.1-R	TATTGTCTATGGATTTCTTG	qRT-PCR analysis in N. benthamiana
113	qNbDef2.2-F	AAAAGCTTGTATCAGTGAG	qRT-PCR analysis in N. benthamiana
114	qNbDef2.2-R	GGATTGAAGTGCCACAC	qRT-PCR analysis in N. benthamiana
